# Supplementary material for: Sb2S3 grown by ultrasonic spray pyrolysis and its application in a hybrid solar cell
Source: publisher site journal article supplement (doi:10.3762/bjnano.7.158), 2016-11-10
Supplement: Additional file 1 [file 2190-4286-7-158-S1.pdf]

# Supporting Information

for

## **Sb<sub>2</sub>S<sub>3</sub> grown by ultrasonic spray pyrolysis and its application in a hybrid solar cell**

Erki Kärber<sup>1\*</sup>, Atanas Katerski<sup>1</sup>, Ilona Oja Acik<sup>1</sup>, Arvo Mere<sup>1</sup>, Valdek Mikli<sup>2</sup> and Malle Krunks<sup>1</sup>

Address: <sup>1</sup>Laboratory of Thin Film Chemical Technologies, Department of Materials Science, Tallinn University of Technology, Ehitajate tee 5, 19086 Tallinn, Estonia and <sup>2</sup>Chair of Semiconductor Materials Technology, Department of Materials Science, Tallinn University of Technology, Ehitajate tee 5, 19086 Tallinn, Estonia

Email: Erki Kärber\* - erki.karber@ttu.ee

\* Corresponding author

## **Additional experimental data**

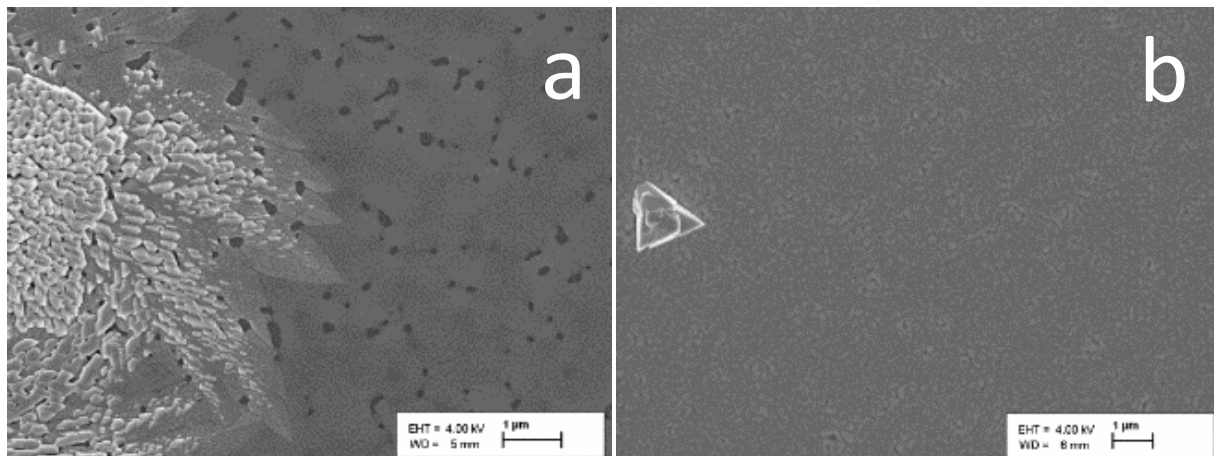

**Figure S1:** Top-view SEM images of Sb<sub>2</sub>S<sub>3</sub> layers grown by ultrasonic-CSP using a) a solution with Sb/S source ratio of 1:3 and b) a solution with Sb/S source ratio of 1:2. Crystalline and amorphous parts are evident in image a. The single tetrahedral crystal in image b is composed of Sb and O according to EDX.

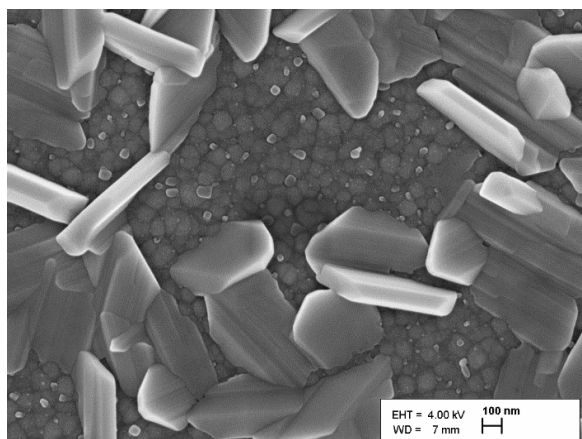

**Figure S2:** Top-view SEM image of Sb<sub>2</sub>S<sub>3</sub> crystals grown by 7-cycles of spraying of solutions with Sb/S precursor ratio of 1:6 onto a TiO<sub>2</sub> substrate kept at 250 °C.

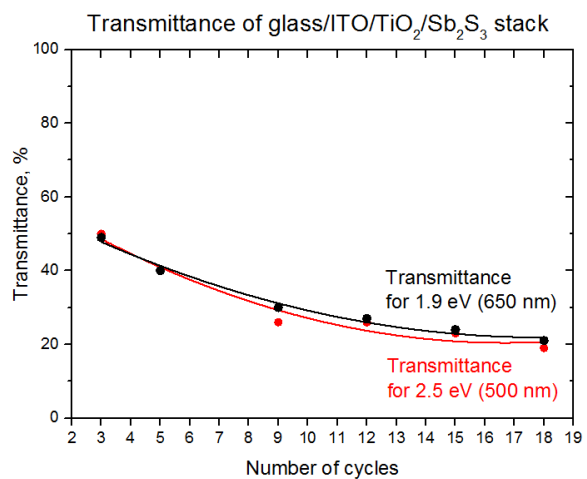

**Figure S3:** Optical transmittance of the glass/ITO/TiO<sub>2</sub>/Sb<sub>2</sub>S<sub>3</sub> stack at two different photon energies (1.9 eV and 2.5 eV) as a function of Sb<sub>2</sub>S<sub>3</sub> growth cycles. The transmittance includes the specular and the diffuse component.

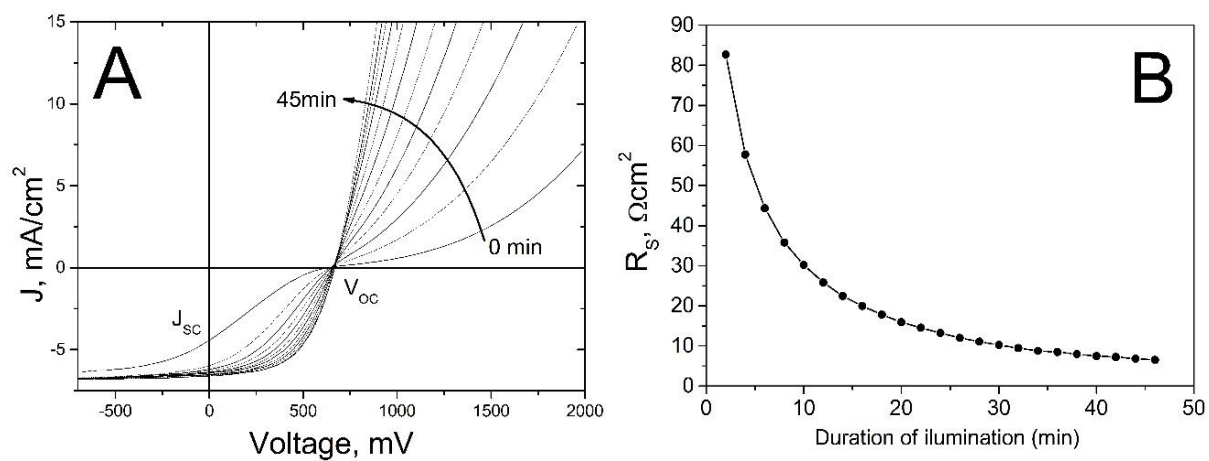

**Figure S4:** Current–voltage characteristics (A) and series resistance (B) of the glass/ITO/TiO<sub>2</sub>/Sb<sub>2</sub>S<sub>3</sub>/P3HT/Au solar cells as a function of the duration of light-soaking using A.M1.5 illumination up to 45 min. The series resistance of the solar cell is calculated using the slope of the  $I$ – $V$  curve rightwards from the location of the  $V_{OC}$ .
